# Supplementary material for: Space–Time Relationship between Short-Term Exposure to Fine and Coarse Particles and Mortality in a Nationwide Analysis of Korea: A Bayesian Hierarchical Spatio-Temporal Model
Source: MDPI journal article supplement (doi:10.3390/ijerph16122111), 2019-06-14
Supplement: s1 [file s1]

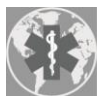

## Supplementary material

**Pearson residual plot of total mortality and PM<sub>2.5</sub>**

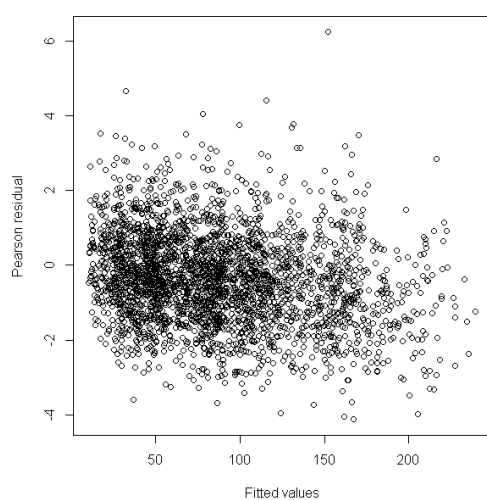

**(a) total mortality and PM<sub>2.5</sub>**

**Pearson residual plot of total mortality and PM<sub>10</sub>**

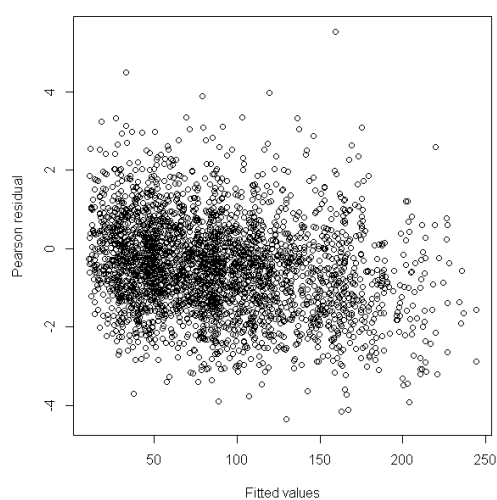

**(b) total mortality and PM<sub>10</sub>**

**Pearson residual plot of cardiovascular mortality and PM<sub>2.5</sub>**

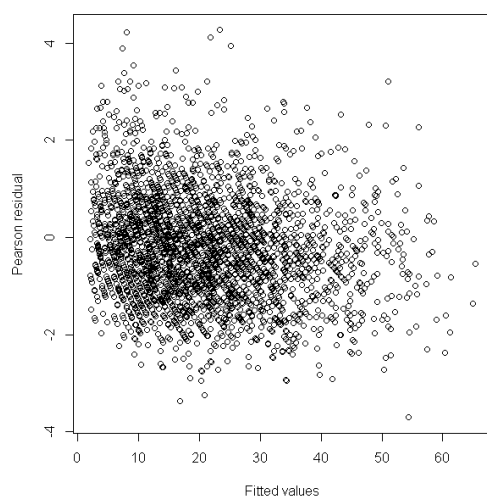

**(c) cardiovascular mortality and PM<sub>2.5</sub>**

**Pearson residual plot of cardiovascular mortality and PM<sub>10</sub>**

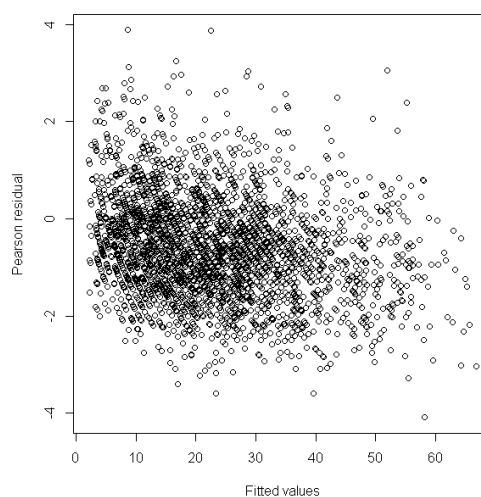

**(d) cardiovascular mortality and PM<sub>10</sub>**

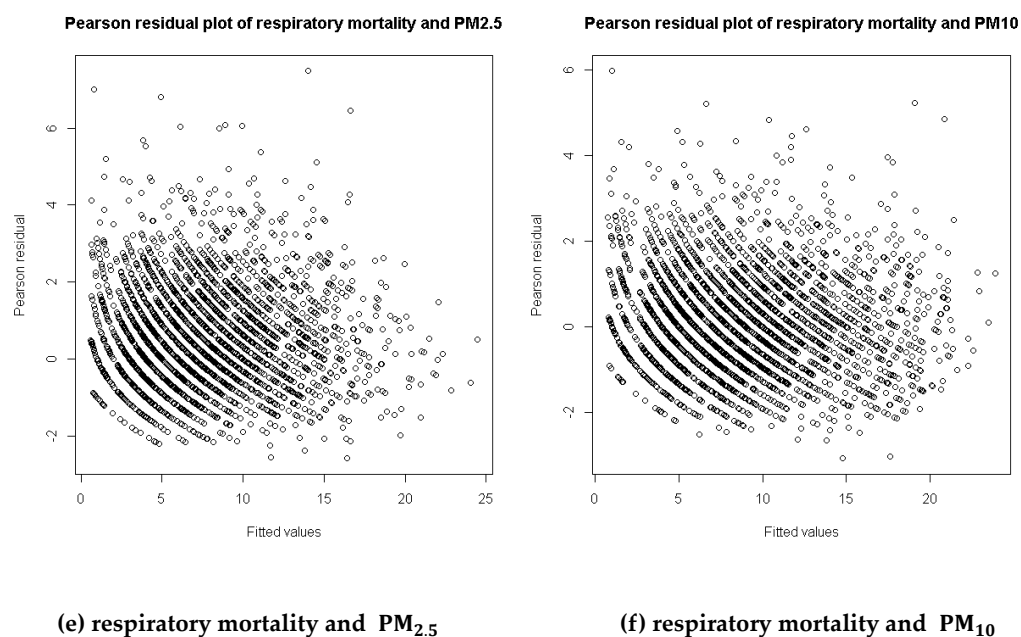

**Figure S1.** Plots of Pearson residuals versus the forecasted values for different types of mortality and air pollutants.

Figure S1 shows the plots of Pearson residuals. The x-axis indicates the forecasted death counts for 2015 and y-axis indicates the Pearson residuals of the observed death counts and forecasted death counts. Pearson residuals  $r_i$  are calculated using the following formula:

$$r_i = \frac{y_i - \hat{y}_i}{\sqrt{\hat{y}_i}} \text{ where } y_i \text{ is the observed death count and } \hat{y}_i \text{ is the forecasted death count.}$$
